1 **Short title: The susceptibility mechanism of rice false smut**

2 **Author for contact details:**

3 Wen-Ming Wang (Tel 86-28-86290949; fax 86-28-86290903; email

4 [j316wenmingwang@sicau.edu.cn](mailto:j316wenmingwang@sicau.edu.cn))

5 Jing Fan (Tel 86-28-86290949; fax 86-28-86290903; email

6 [fanjing13971@sicau.edu.cn](mailto:fanjing13971@sicau.edu.cn))

## 7                    **Insights into the susceptibility of rice to a floral disease**

8

9    Guo-Bang Li<sup>1,\*</sup>, Jing Fan<sup>1,\*</sup>, Jie Liu<sup>1</sup>, Jin-Long Wu<sup>1</sup>, Xiao-Hong Hu<sup>1</sup>, Jia-Xue He<sup>1</sup>,  
10    Shuai Shen<sup>1</sup>, He Wang<sup>1</sup>, Yong Zhu<sup>1</sup>, Feng He<sup>2</sup>, Han Gao<sup>3</sup>, Zeeshan Ghulam Nabi  
11    Gishkori<sup>1</sup>, Jing-Hao Zhao<sup>1</sup>, Yan Li<sup>1</sup>, Fu Huang<sup>1</sup>, Yan-Yan Huang<sup>1</sup>, Zhi-Xue Zhao<sup>1</sup>, Ji-  
12    Wei Zhang<sup>1</sup>, Shi-Xin Zhou<sup>1</sup>, Mei Pu<sup>1</sup>, Xuwei Chen<sup>1</sup>, Jing Wang<sup>1</sup>, Weitao Li<sup>1</sup>, Xian-  
13    Jun Wu<sup>1</sup>, Yuese Ning<sup>2</sup>, Wenxian Sun<sup>3</sup>, Wen-Ming Wang<sup>1</sup>

14

15    <sup>1</sup>State Key Laboratory of Crop Gene Exploration and Utilization in Southwest China,  
16    Sichuan Agricultural University, Chengdu, 611130, China

17    <sup>2</sup>State Key Laboratory for Biology of Plant Diseases and Insect Pests, Institute of  
18    Plant Protection, Chinese Academy of Agricultural Sciences, Beijing 100193, China

19    <sup>3</sup>College of Plant Protection and the Ministry of Agriculture Key Laboratory of Pest  
20    Monitoring and Green Management, China Agricultural University, Beijing 100193,  
21    China

22    \*These authors contributed equally to this work.

### 23    **One Sentence Summary**

24    The fungal pathogen *Ustilaginoidea virens* disarms chitin-triggered immunity in rice  
25    flower via a secreted chitinase.

### 26    **Author Contributions**

27    JF and WMW conceived and designed the project. YL, YN, WS and FH contributed to  
28    the planning of research. JF, GBL, JL, XHH, HW, JXH, JLW, YZ, FH, HG, SS, ZGNG  
29    and JHZ performed the experiments and analyzed the data. YYH, ZXX, JWZ, SXZ, MP,  
30    XC, JW, WL, XJW analyzed the data. JF, GBL and WMW wrote the manuscript with  
31    input from the other authors. JF and GBL contributed equally. All authors read and  
32    approved the final manuscript.

33

34 **Funding Information**

35 This work was supported by grants from the National Natural Science Foundation of  
36 China (31772241 and 32072503 to J.F.) and from the Science and Technology Program  
37 Project of Sichuan Province (2020YJ0145 to J.F., 2020YJ0332 to W.-M.W.).

38 **ABSTRACT**

39 Crop floral diseases are economically important as they reduce grain yield and quality  
40 and even introduce food toxins. Rice false smut has emerged as a serious floral disease  
41 producing mycotoxins. However, very little is known on the interaction mechanisms  
42 between rice flower and the causal fungus *Ustilaginoidea virens*. Here we show that a  
43 conserved anti-fungal immunity in rice flower is disarmed by *U. virens* via a secreted  
44 protein UvChi1. UvChi1 functioned as an essential virulence factor and directly  
45 interacted with the chitin receptor CEBiP and co-receptor CERK1 in rice to disrupt their  
46 oligomerizations and subsequent immune responses. Moreover, intraspecific-  
47 conserved UvChi1 could target OsCEBiP/OsCERK1 receptor complex in at least 98.5%  
48 of 5232 surveyed rice accessions. These results demonstrate that *U. virens* utilizes a  
49 crucial virulence factor to subvert chitin-triggered flower immunity in most rice  
50 varieties, providing new insights into the susceptibility of rice to false smut disease.

51

52 **Keywords:** chitin-triggered immunity, floral disease, rice false smut, susceptibility,  
53 *Ustilaginoidea virens*, *Villosiclava virens*.

54

## 55 INTRODUCTION

56 Flower-infecting fungal pathogens cause many detrimental crop diseases, such as  
57 Fusarium head blight in wheat (caused by *F. graminearum*) (Xu and Nicholson, 2009),  
58 Ergot disease in rye (caused by *Claviceps purpurea*) (Tudzynski and Scheffer, 2004),  
59 and corn smut disease (caused by *Ustilago maydis*) (Brefort et al., 2009). Some floral  
60 pathogens even introduce food toxins, such as DON produced by *F. graminearum* and  
61 Ergot alkaloids generated by *C. purpurea* (Tudzynski and Scheffer, 2004; Xu and  
62 Nicholson, 2009). *Ustilaginoidea virens* (Cooke) Takahashi (teleomorph: *Villosiclava*  
63 *virens*) is an emerging fungal pathogen infecting rice flower and causes rice false smut  
64 (RFS) disease, not only resulting in yield loss and quality reduction but also threatening  
65 the health of humans and animals due to *U. virens*-produced mycotoxins (Zhou et al.,  
66 2012; Sun et al., 2020). Numerous rice germplasms have been evaluated with different  
67 sensitivities to *U. virens* and a set of quantitative trait loci (QTL) for false smut field  
68 resistance have been mapped. However, neither fully-resistant rice cultivars have been  
69 identified nor false smut resistance genes have been cloned (Sun et al., 2020). Gene-  
70 for-gene resistance has not been found in rice against *U. virens*. Management and  
71 control of RFS disease will benefit from dissection of the compatible mechanism  
72 between rice flower and *U. virens*.

73 *U. virens* possesses specific infection strategies in rice flower. At late booting stage  
74 of rice, *U. virens* spores contacting rice developing spikelets can germinate on the  
75 surface of lemma and palea, on which no infection sites have been observed (Ashizawa  
76 et al., 2012; Tang et al., 2013). Instead, *U. virens* hyphae epiphytically extend into inner  
77 space of rice spikelets through the gap between the lemma and palea, and then primarily  
78 attack stamen filaments intercellularly (Ashizawa et al., 2012; Tang et al., 2013). *U.*  
79 *virens* can also infect lodicules, stigmas, and styles, but to a lesser extent (Tang et al.,  
80 2013; Song et al., 2016). After successful colonization, *U. virens* forms massive mycelia  
81 to embrace all the inner floral organs, and ultimately produces ball-shape fungal  
82 colonies named false smut balls, which are the only visible symptom of RFS disease  
83 (Fan et al., 2016; Sun et al., 2020). Although *U. virens* infects multiple floral parts, it

84 requires rice stamens, but not pistils, for the formation of false smut balls (Fan et al.,  
85 2020). Again, *U. virens* infects roots and coleoptiles of rice, but cannot produce false  
86 smut balls in these organs (Ikegami, 1963; Schroud and TeBeest, 2005; Prakobsb and  
87 Ashizawa, 2017; Yong et al., 2018). It has been suggested that *U. virens* may hijack  
88 grain filling system in rice spikelets to obtain abundant nutrients for the formation of  
89 false smut balls (Fan et al., 2015; Song et al., 2016).

90 As a successful biotrophic pathogen (Zhang et al., 2014), first of all, *U. virens* should  
91 be able to evade or suppress host immunity. Previous transcriptome analyses indicate  
92 that expression of rice defense-related genes, such as *PAL* and *PR* genes, could be down-  
93 regulated upon *U. virens* infection (Fan et al., 2015; Han et al., 2015). *U. virens* can  
94 deploy a set of immunosuppressive effectors during infection (Zhang et al., 2014; Sun  
95 et al., 2020). Particularly, effector proteins such as SCRE1, UV\_1261/SCRE2, and  
96 UV\_5215 could inhibit cell death and/or pattern-triggered immunity (PTI) in plants.  
97 SCRE1 and UV\_1261/SCRE2 both contribute to the virulence of *U. virens* in rice  
98 flower (Zhang et al., 2014; Fan et al., 2019; Fang et al., 2019; Zhang et al., 2020).  
99 However, their host targets and virulence mechanisms are unknown.

100 To counteract the infection of fungal pathogens, plants can mount a critical defense  
101 pathway called chitin-triggered immunity, i.e. chitin from the fungal cell wall is  
102 recognized by plant cell surface receptors to induce PTI (Jones and Dangl, 2006; Gong  
103 et al., 2020). In rice leaf organ, OsCEBiP functions as a major receptor with high  
104 affinity for chitin (Kaku et al., 2006; Hayafune et al., 2014). Two additional Lysin motif-  
105 containing proteins, OsLYP4 and OsLYP6, act as minor chitin receptors (Liu et al.,  
106 2012). As these chitin receptors lack a kinase domain, chitin signaling requires a co-  
107 receptor OsCERK1 to activate downstream signaling components (Shimizu et al.,  
108 2010). In turn, downstream cytoplasmic kinases such as OsRLCK118/176/185 regulate  
109 chitin-induced Ca<sup>2+</sup> influx, activation of mitogen-activated protein kinase (MAPK), and  
110 burst of reactive oxygen species (ROS) (Wang et al., 2017; Fan et al., 2018; Wang et  
111 al., 2019). Compared to the well-documented leaf immunity in rice, little is known on  
112 the flower immunity. It is unrevealed whether OsCEBiP/OsCERK1-mediated chitin

113 signaling is involved in the molecular interaction between rice flower and *U. virens*.

114 To understand the molecular events in the front line of battlefield between *U. virens*  
115 and rice flower, we previously performed a dual-transcriptome study on *U. virens*  
116 infecting with rice flower (Fan et al., 2015). Our subsequent studies focused on a  
117 number of *U. virens* genes whose transcriptional levels were highly increased during  
118 infection and the encoded proteins were putatively secreted (Fan et al., 2019). In this  
119 study, we report a candidate gene *UvChi1* that functions as a crucial virulence factor  
120 and subverts a highly conserved chitin-triggered immunity in rice flower. This study  
121 provides new insights into the pathogenic mechanism of *U. virens* and defense  
122 mechanism of rice flower, and gives implications for controlling rice false smut disease.

123

## 124 **RESULTS**

### 125 ***UvChi1* is a secreted protein essential for *U. virens* pathogenicity**

126 In a previous transcriptome analysis, we found that *Uv5918* was among the most up-  
127 regulated genes in *U. virens* infecting rice flower (Fan et al., 2015). In this study, we  
128 determined a time-course expression pattern of *Uv5918* by RT-qPCR analysis.  
129 Compared to the expression level of *Uv5918* in axenic culture, the abundance of  
130 *Uv5918* transcripts started to increase at 5 day post inoculation (dpi), peaked at 7 dpi  
131 with more than 20-fold increase when *U. virens* hyphae invaded into the inner floral  
132 organs of rice spikelets (Fan et al., 2015) (Fig. 1A). Sequence analysis revealed that  
133 *Uv5918* (hereafter *UvChi1*) encoded a putative protein with 450 amino acid (aa),  
134 containing a predicted signal peptide (SP) and a putative chitinase active site  
135 (Supplemental Fig. S1). The secretion of *UvChi1* was examined by Western blot  
136 analysis with an *UvChi1*-specific antibody. The control experiment with the GAPDH-  
137 specific antibody generated expected band only in the mycelia sample but not in the  
138 supernatant, indicating no contamination of fungal mass in the supernatant. By contrast,  
139 *UvChi1* protein could be detected in both mycelia and supernatant fractions (Fig. 1B),  
140 indicating that *UvChi1* could be secreted by *U. virens*. The functionality of *UvChi1* SP  
141 was further verified by a yeast secretion assay as described previously (Jacobs et al.,

142 1997; Fang et al., 2016; Fan et al., 2019). The sequence encoding predicted SP of  
143 *UvChi1* was fused in frame with mature invertase (*SUC2*) and introduced into the yeast  
144 strain YTK12. The wild-type YTK12 cannot utilize raffinose due to its deficiency in  
145 invertase secretion, whereas the YTK12 strain transformed with the *UvChi1<sup>SP</sup>-SUC2*  
146 could grow well on YPRAA medium supplemented with raffinose as the sole carbon  
147 source. YTK12 strains transformed with *Avr1b<sup>SP</sup>-SUC2* or *Mg87<sup>N-terminus</sup>-SUC2* were  
148 used as the positive and negative control, respectively (Fig. 1C). As a result, *UvChi1<sup>SP</sup>*  
149 is a functional SP.

150 To determine the role of *UvChi1* in pathogenicity, we knockout it in *U. virens* using  
151 a CRISPR-Cas9-assisted gene replacement approach (Liang et al., 2018), and obtained  
152 multiple knockout mutants (Supplemental Fig. S2). Markedly, knockout mutant *uvchi1*  
153 lost pathogenicity in rice panicles, i.e. failing to develop RFS balls. The  
154 complementation strain could restore the ability to form RFS balls (Fig. 1D, F;  
155 Supplemental Fig. S2). By contrast, the *uvchi1* knockout mutant showed normal colony  
156 morphology comparable to wild-type and complementation strains (Fig. 1E). These  
157 data suggest that *UvChi1* is an essential virulence factor of *U. virens*.



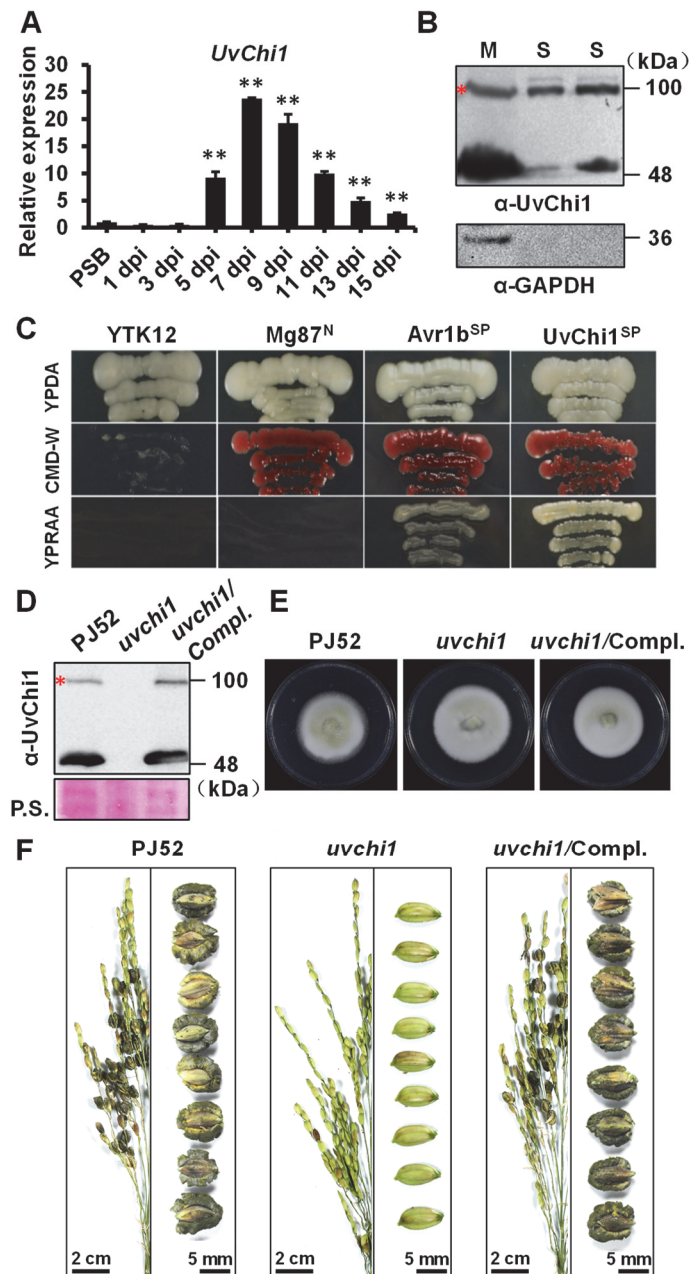

158

159 **Figure 1.** UvChi1 is a secreted protein essential for *Ustilaginoidea virens* pathogenicity in rice

160 flower. **A**, Expression analysis of *UvChi1* during *U. virens* infection of rice. Spikelets from PJ52-

161 inoculated rice panicles were sampled at indicated time points and subjected to RT-qPCR analysis.

162 The mixture of mycelia and conidia from PSB-cultured PJ52 was collected as the control sample.

163 Relative expression level of *UvChi1* was determined using *UvTub2α* as the reference gene. Data are

164 represented as means ± SD of three biological replicates. Asterisk indicates significant difference

165 determined by Student's *t* test (\**P* < 0.05, \*\* *P* < 0.01). Similar results were obtained from two

166 independent experiments. dpi, day post inoculation. **B**, UvChi1 can be secreted into the culture

167 medium. Total protein from PSB-cultured *U. virens* mycelia and cultured supernatants were

168 subjected to Western blot analysis. Red asterisk indicates putative dimer of UvChi1.  $\alpha$ -UvChi1, anti-  
169 UvChi1 antibody.  $\alpha$ -GAPDH, anti-glyceraldehyde-3-phosphate dehydrogenase antibody. M,  
170 mycelia. S, supernatant. **C**, Validation of UvChi1 signal peptide (SP). The DNA fragment encoding  
171 SP of UvChi1 was cloned into pSUC2, in frame with an invertase gene. The resultant plasmid was  
172 transformed into YTK12 that is unable to utilize raffinose. SP of UvChi1 could enable YTK12 to  
173 grow on YPRAA medium, indicating its functionality. SP of Avr1b and N terminus of Mg87 were  
174 applied as positive and negative controls, respectively. **D**, Western blot analysis of *UvChi1* knockout  
175 and complementation strains using UvChi1-specific antibody. **E**, Top view of *UvChi1* knockout and  
176 complementation strains, and wild-type PJ52 cultured in PSA media for two weeks. **F**, Pathogenicity  
177 assay of *UvChi1* knockout and complementation strains, and PJ52. Inocula of indicated *U. virens*  
178 strains were injected into the panicles ( $n \geq 30$  for each strain) of rice accession Q455 at late  
179 booting stage. Disease phenotype was recorded at four week post inoculation (wpi). Note that no  
180 false smut balls were formed in *uvchi1* mutant-inoculated rice panicles.

### 181 **UvChi1 suppresses chitin-induced immunity in rice**

182 To explore the virulence mechanism of UvChi1, we first assessed whether UvChi1  
183 modulate immune response in rice. We generated transgenic rice ectopically over-  
184 expressing *UvChi1* and confirmed its expression in both leaf and flower organs (Fig. 2).  
185 In both leaf and flower organs of wild-type rice, chitin could induce the expression of  
186 defense-related genes, such as *OsBETV1*, *OsNAC4*, and *OsPRI0b*. Markedly, the  
187 induction of these genes was suppressed in UvChi1-expressing leaves and flowers (Fig.  
188 2), supporting a role of UvChi1 in blocking rice immunity to promote infection  
189 (Supplemental Fig. S3).

190 As reported, fungal chitinases have evolved as effector proteins to prevent chitin-  
191 triggered plant immunity via their ability of binding with chitin or degrading chitin  
192 oligomers (Fiorin et al., 2018; Han et al., 2019; Yang et al., 2019; Martínez-Cruz et al.,  
193 2021). In consistent with these reports, *UvChi1* encoded an enzymatically active fungal  
194 chitinase (Supplemental Fig. S1), which possessed chitin-binding ability and could  
195 suppress chitin-triggered ROS burst and induction of defense gene expression in rice  
196 (Supplemental Fig. S4).

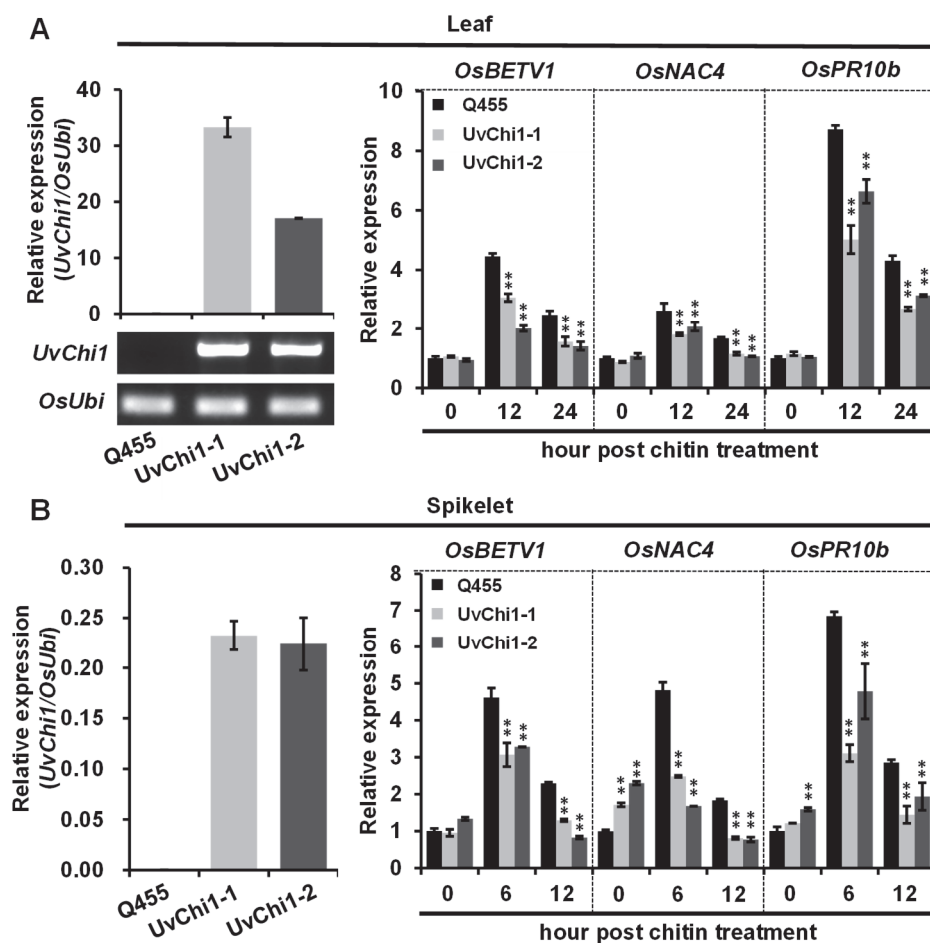

197

198 **Figure 2.** Ectopic expression of *UvChi1* suppresses chitin-induced expression of defense-related  
 199 genes in rice. *UvChi1* was driven by a 35S promoter and expressed in rice accession Q455. The  
 200 expression of *UvChi1* was confirmed in leaf (**A**) and spikelet (**B**) of transgenic lines by RT-qPCR.  
 201 Then, leaf and spikelet samples were respectively treated with chitin and sampled at indicated time  
 202 points for RT-qPCR analysis of rice defense-related genes. Relative expression levels of indicated  
 203 genes were determined using *OsUbi* as the reference gene. Data are represented as means  $\pm$  SD of  
 204 three biological replicates. Asterisk indicates significant difference determined by Student's *t* test  
 205 (\*\*  $P < 0.01$ ).

206 ***UvChi1* interacts with OsCEBiP and OsCERK1 to impair their mediated chitin**  
 207 **signaling in rice**

208 Fungal chitinase effectors may target to or be recognized by plant cell surface  
 209 proteins, which is supported by that *Magnaporthe oryzae* MoChial can interact with  
 210 rice plasma membrane proteins OsMBL1 and OsTPR1 (Han et al., 2019; Yang et al.,

211 2019). OsMBL1 is a jacalin-related Mannose-Binding Lectin protein contributing to  
212 chitin perception and chitin-triggered rice immunity, which can be suppressed by  
213 MoChia1 (Han et al., 2019). OsTPR1 is a tetratricopeptide-repeat family protein and  
214 functions as an immune receptor recognizing MoChia1 to regain chitin-triggered  
215 immunity in rice (Yang et al., 2019). We found that, unlike MoChia1, UvChi1 could  
216 not interact with OsMBL1 and OsTPR1 (Supplemental Fig. S5), although *OsMBL1* and  
217 *OsTPR1* were highly expressed in rice flower organ (Supplemental Fig. S6).

218 Cell surface receptors OsCEBiP and OsCERK1 play central roles in chitin-triggered  
219 immunity in rice (Gong et al., 2020). As *OsCEBiP* and *OsCERK1* were expressed even  
220 higher in rice flowers than in leaves (Supplemental Fig. S6), we tested whether  
221 OsCEBiP and OsCERK1 could interact with UvChi1. In GST pull-down assay,  
222 OsCEBiP or OsCERK1 was expressed with a GST tag, and UvChi1 was expressed with  
223 an MBP tag. MBP-UvChi1 could be pull-down by both GST-OsCEBiP and GST-  
224 OsCERK1, but not by GST alone, indicating direct interactions of UvChi1 with  
225 OsCEBiP and OsCERK1 (Fig. 3A). Co-IP assay further confirmed that UvChi1 was  
226 physically associated with OsCEBiP and OsCERK1 (Fig. 3B). Interestingly, UvChi1  
227 protein mutated at its putative chitin-binding sites (UvChi1<sup>mcb</sup>) lost chitin-  
228 binding/degrading ability (Supplemental Fig. S7), but could still interact with OsCEBiP  
229 and OsCERK1 both *in vitro* and *in vivo* (Fig. 3).

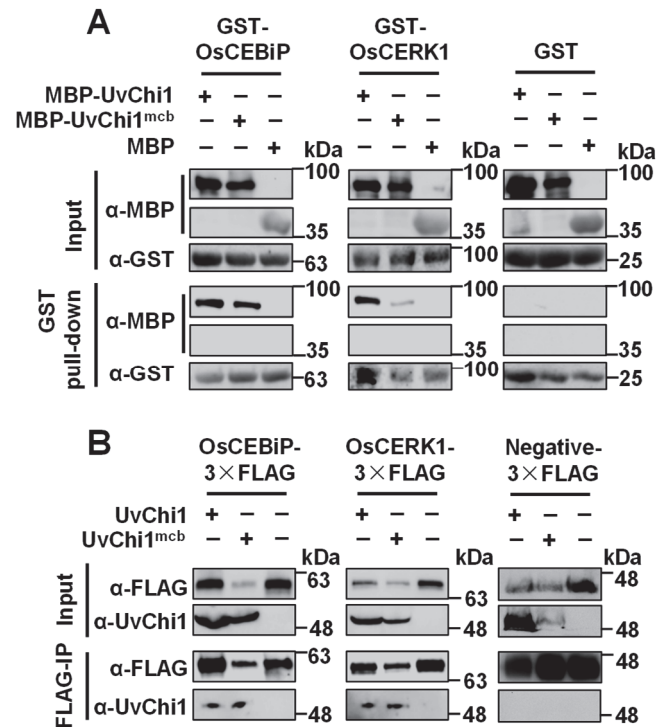

230

231 **Figure 3.** UvChi1 interacts with OsCEBiP and OsCERK1. **A**, *In vitro* GST pull-down assay. The  
 232 recombinant proteins GST-OsCEBiP, GST-OsCERK1, MBP-UvChi1, and MBP-UvChi1<sup>mcb</sup>  
 233 (mutated at chitin binding sites) were purified from *Escherichia coli*. GST and MBP tag proteins  
 234 were used as negative controls. Protein interaction was visualized with Western blot. **B**, *In vivo* co-  
 235 immunoprecipitation (Co-IP) assay. OsCEBiP-3×FLAG or OsCERK1-3×FLAG was co-  
 236 expressed with UvChi1, UvChi1<sup>mcb</sup> in *Nicotiana benthamiana*. A FLAG-tagged protein without  
 237 interaction with UvChi1 was served as the negative control. IP was conducted using anti-FLAG  
 238 affinity gel and subjected to Western blot analysis using anti-FLAG or anti-UvChi1 antibodies. Note  
 239 that the coding region of *OsCEBiP* and *OsCERK1* were amplified from NPB, representing  
 240 polymorphic type 1 (T1) as depicted in Figure 5.

241 Chitin-induced oligomerization of chitin receptors is a prerequisite for intracellular  
 242 chitin signaling in Arabidopsis and rice (Gong et al., 2020). We thus tested whether  
 243 UvChi1 could affect the oligomerization of OsCERK1 and OsCEBiP. We conducted  
 244 Co-IP assays in *Nicotiana benthamiana*, and found that UvChi1 could reduce the  
 245 interactions of OsCEBiP-OsCEBiP, OsCEBiP-OsCERK1, and OsCERK1-OsCERK1  
 246 (Fig. 4A). The competition effects became stronger along with the increasing amounts

247 of UvChi1 protein (Fig. 4A). Similar results were obtained for UvChi1<sup>mcb</sup>. These results  
248 suggest that UvChi1 disrupts homo- and hetero-oligomerization of OsCERK1 and  
249 OsCEBiP, which is independent on its chitin-binding sites.

250 Next, we intended to assess whether OsCEBiP/OsCERK1-mediated immune  
251 responses were suppressed by UvChi1. To exclude the immunosuppressive effects of  
252 UvChi1 resulting from its chitin-binding/degrading ability, we included UvChi1<sup>mcb</sup> in  
253 the subsequent experiments. In *N. benthamiana* expressing *OsCEBiP/OsCERK1*,  
254 chitin-induced ROS production could be suppressed by MBP-UvChi1 but not by MBP-  
255 UvChi1<sup>mcb</sup> and MBP, when chitin was pre-incubated with the recombinant proteins.  
256 However, when leaves were pre-incubated with the recombinant proteins before chitin  
257 treatment (which may give enough time for the recombinant proteins to approach the  
258 cell surface receptors OsCEBiP and OsCERK1), chitin-induced ROS could be inhibited  
259 by both MBP-UvChi1 and MBP-UvChi1<sup>mcb</sup> (Fig. 4B). In wild-type rice NPB, chitin-  
260 induced expression of defense-related genes could be repressed by MBP-UvChi1 but  
261 not by MBP-UvChi1<sup>mcb</sup> when chitin was pre-incubated with the recombinant proteins;  
262 whilst MBP-UvChi1<sup>mcb</sup> showed markedly immunosuppressive effects when it was pre-  
263 incubated with leaf discs before chitin treatment (Fig. 4D-F). By contrast, in *N.*  
264 *benthamiana* without expression of *OsCEBiP/OsCERK1* and in rice *oscebip/oscerk1*  
265 double mutant (Supplemental Fig. S8), pre-incubation of leaves with MBP-UvChi1<sup>mcb</sup>  
266 no longer blocked chitin-induced ROS and expression of defense-related genes (Fig.  
267 4C-F). These data indicate that UvChi1<sup>mcb</sup> can suppress chitin-triggered plant immunity  
268 in an OsCEBiP/OsCERK1-dependent manner.

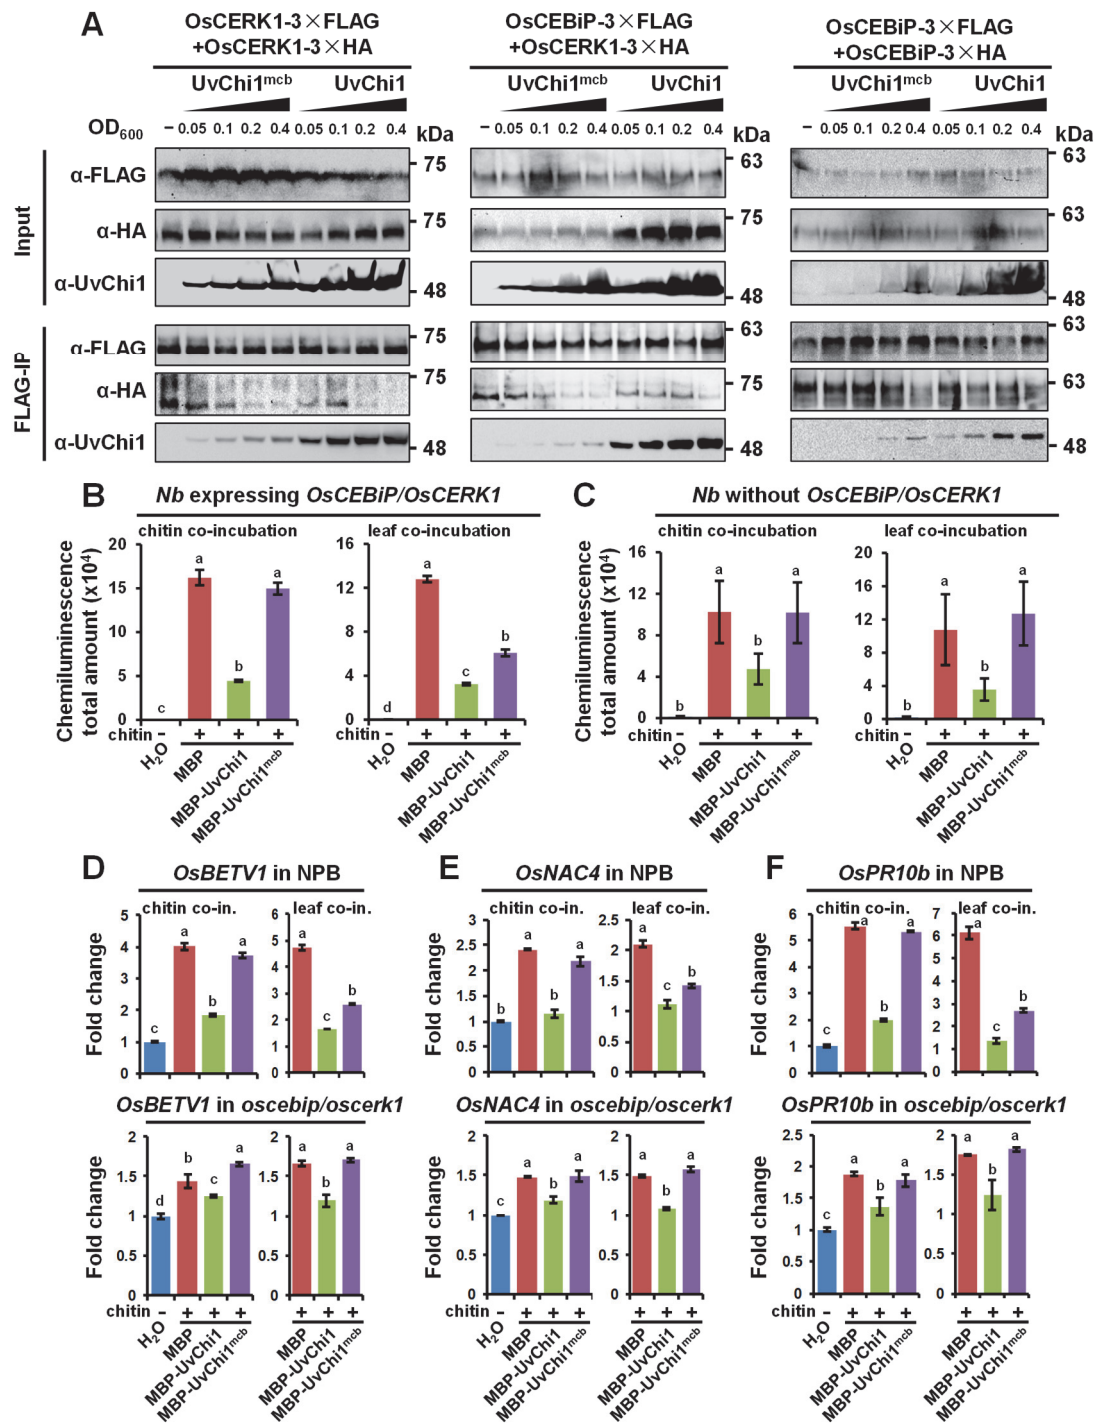

269

270 **Figure 4.** UvChi1 impairs OsCEBiP/OsCERK1-mediated chitin signaling in rice. **A**, UvChi1  
 271 reduces homo- and hetero-oligomerizations of OsCERK1 and OsCEBiP. For competitive Co-IP  
 272 assay, OsCERK1 and OsCEBiP tagged with FLAG or HA was transiently co-expressed  
 273 with/without UvChi1 or UvChi1<sup>mcb</sup> in *Nicotiana benthamiana*. At 48 hour post infiltration, leaves  
 274 were treated with chitin by infiltration for 10 min prior to protein extraction. IP was conducted using  
 275 anti-FLAG affinity gel and subjected to Western blot analysis using anti-FLAG, anti-HA, or anti-

276 UvChi1 antibodies. **B**, ROS assay in *Nicotiana benthamiana* (*Nb*) transiently expressing *OsCEBiP*  
277 and *OsCERK1*. *Nb* leaves were infiltrated with GV3101 strains harboring expression constructs of  
278 *OsCEBiP* and *OsCERK1*. Leaf discs were sampled for ROS assay at 36 hour post infiltration. The  
279 indicated recombinant proteins were either co-incubated with chitin for 1 h (namely chitin co-  
280 incubation treatment) before ROS detection, or co-incubated with leaf discs for 6 h (namely leaf co-  
281 incubation treatment) before measurements of chitin-induced ROS. Please refer to Materials and  
282 Methods for details. Data are represented as mean  $\pm$  SD of four biological replicates. Different letters  
283 above data bars indicate significant difference as determined by one-way ANOVA with post hoc  
284 Tukey HSD analysis ( $P < 0.05$ ). Similar results were obtained from two independent experiments.  
285 **C**, ROS assay in *Nb* leaves without expressing *OsCEBiP* and *OsCERK1*. Measurements of ROS  
286 and data analysis were the same as in **B**. Note that the coding region of *OsCEBiP* and *OsCERK1*  
287 were amplified from NPB, representing polymorphic type 1 (T1) as depicted in Figure 5. **D-F**,  
288 Expression analysis of defense-related genes in rice leaves of NPB and *oscebip/oscerk1* double  
289 mutant. Leaf discs were sampled at 4-leaf stage rice seedlings. The indicated recombinant proteins  
290 were either co-incubated with chitin or co-incubated with leaf discs before analysis of chitin-induced  
291 gene expression. Data are represented as mean  $\pm$  SD of three repeats. Different letters above data  
292 bars indicate significant difference as determined by one-way ANOVA with post hoc Tukey HSD  
293 analysis. Similar results were obtained from three independent biological experiments.

## 294 **UvChi1 targeting OsCEBiP/OsCERK1 is highly conserved in the *U. virens*-rice** 295 **pathosystem**

296 We intended to test whether the interaction module of UvChi1–OsCEBiP/OsCERK1  
297 was conserved in the *U. virens*-rice pathosystem. We first analyzed the polymorphisms  
298 of OsCEBiP and OsCERK1 protein sequences among over 5000 rice accessions, of  
299 which the genomic data are retrieved from the database of MBKbase-rice  
300 (<http://mbkbase.org/rice>) (Peng et al., 2020). We detected seven and six polymorphism  
301 types for OsCEBiP and OsCERK1, respectively. For OsCEBiP, the majority (57.42%)  
302 of 4962 detected rice accessions had the identical protein sequence to the reference  
303 NPB; 38.11% (designated as polymorphism type 2, T2) had two amino acid changes  
304 located at position 42 and 57; 4.06% had truncations at the C-terminus of OsCEBiP



305 (Fig. 5A; Supplemental Fig. S9). For OsCERK1, 29.21% of 5066 detected rice  
306 accessions possessed identical protein sequence to NPB; 57.58% (designated as T2)  
307 had three amino acid differences at position 118, 121, and 250 (Fig. 5B). We then  
308 analyzed the polymorphism of UvChi1 among over 50 *U. virens* field isolates  
309 originated from different rice production areas in China, as well as in Japan and Nepal  
310 (Supplemental Fig. S11). Surprisingly, we detected no polymorphisms for UvChi1  
311 protein sequences from all the tested *U. virens* isolates, although one InDel was detected  
312 in an intron and one synonymous substitution was found in an exon of *UvChi1* gene  
313 (Fig. 5C).

314 Since OsCEBiP<sup>NPB</sup> and OsCERK1<sup>NPB</sup> interacted with UvChi1 (Fig. 3), we tested the  
315 interactions between OsCEBiP<sup>T2</sup> (OsCERK1<sup>T2</sup>) and UvChi1. Interestingly, both  
316 OsCEBiP<sup>T2</sup> and OsCERK1<sup>T2</sup> could interact with UvChi1 and UvChi1<sup>mcb</sup> (Fig. 5D), and  
317 oligomerizations of OsCEBiP<sup>T2</sup> and OsCERK1<sup>T2</sup> were also disrupted by UvChi1 and  
318 UvChi1<sup>mcb</sup> (Supplemental Fig. S10). These data indicate that UvChi1 can target  
319 OsCEBiP in at least 95.53% of 4962 rice accessions, and OsCERK1 in at least 86.79%  
320 of 5066 accessions. Collectively, highly conserved UvChi1 interferes with either  
321 OsCEBiP or OsCERK1 in over 98.5% of 5232 rice accessions.

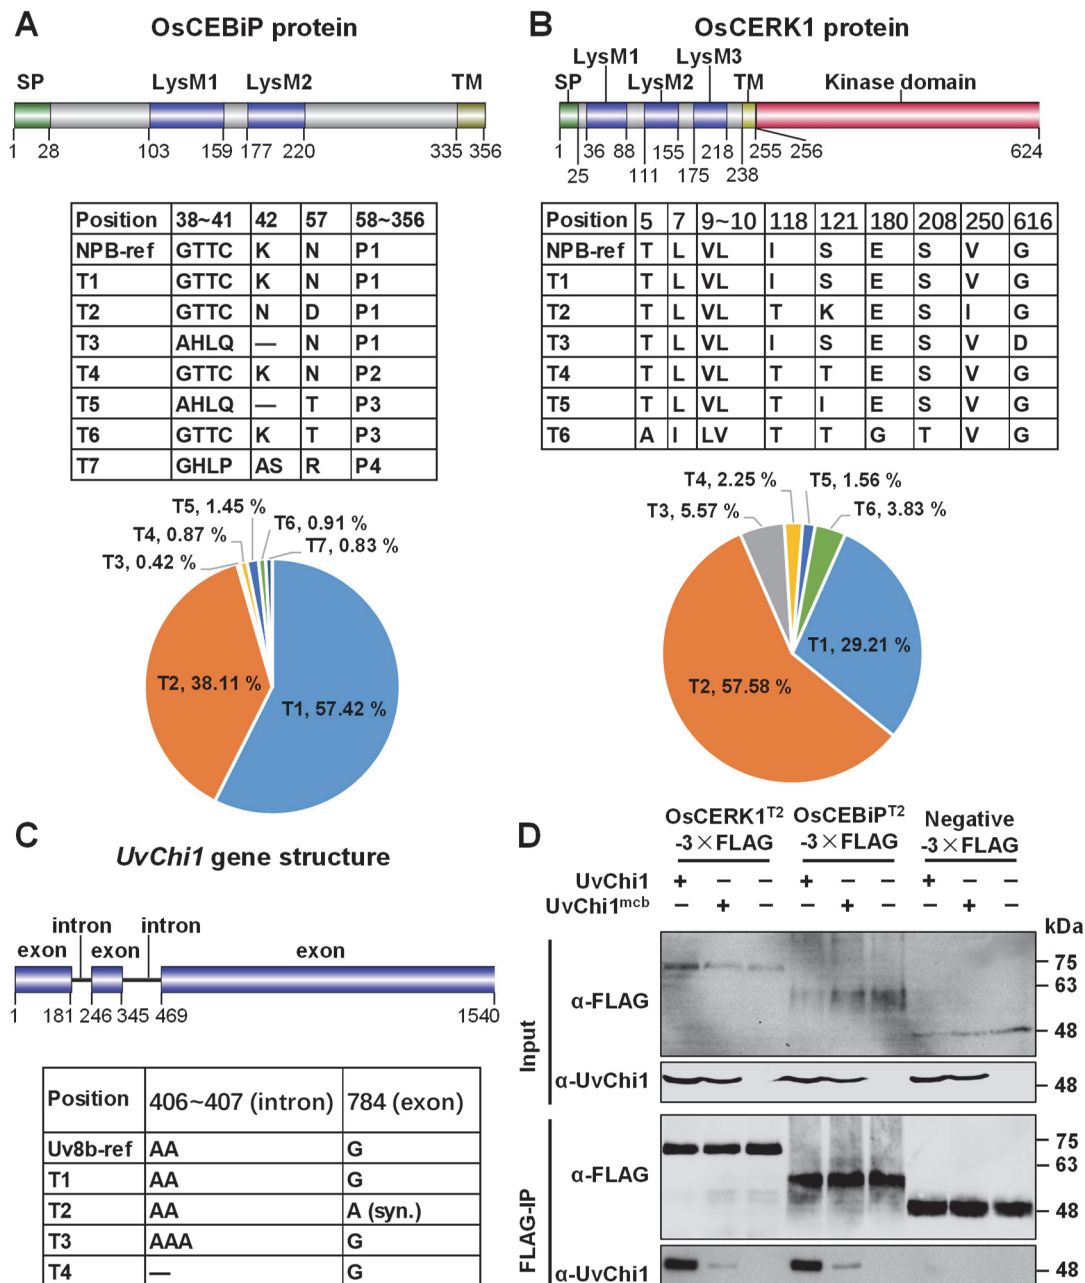

322

323 **Figure 5.** UvChi1-OsCEBiP/OsCERK1 interaction module is highly conserved in the  
 324 *Ustilaginoidea virens*-rice pathosystem. **A-B**, Polymorphism analysis of OsCEBiP (**A**) and  
 325 OsCERK1 (**B**) protein sequences. Schematic diagram of protein domains was shown. Protein  
 326 sequences of OsCEBiP and OsCERK1 in over 5000 rice accessions were retrieved from MBKbase-  
 327 rice database (<http://mbkbase.org/rice>). Polymorphic types (T1-T7) were determined using  
 328 Nipponbare as the reference. Percentage for each polymorphic type was shown as pie charts. Protein  
 329 sequences representing P1-P4 were presented in Supplemental Fig. S9. SP, signal peptide. LysM,  
 330 lysin motif. TM, transmembrane domain. **C**, Polymorphism analysis of UvChi1. Schematic diagram

331 of *UvChi1* gene structure was displayed. Genomic sequences of *UvChi1* from over 50 *U. virens*  
332 isolates originated from North, West, Middle, and East China, as well as Japan and Nepal, were  
333 amplified and sequenced. Polymorphic types (T1-T4) were determined using Uv8b strain as the  
334 reference. One InDel in an intron and one synonymous substitution (syn.) in an exon were detected.  
335 **D**, Co-IP assay. As polymorphic type T1 (Nipponbare reference type) plus T2 of OsCEBiP and  
336 OsCERK1 accounted for 86.79%-95.53% in over 5000 rice accessions. OsCEBiP<sup>T2</sup> and  
337 OsCERK1<sup>T2</sup> were also tested for interactions with UvChi1. OsCEBiP<sup>T2</sup>-3×FLAG or OsCERK1<sup>T2</sup>-  
338 3×FLAG was co-expressed with UvChi1 or UvChi1<sup>mcb</sup> in *Nicotiana benthamiana*. An FLAG-  
339 tagged protein without interaction with UvChi1 was served as the negative control. IP was  
340 conducted using anti-FLAG affinity gel and subjected to Western blot analysis using anti-FLAG or  
341 anti-UvChi1 antibodies.

#### 342 **UvChi1 disarms OsCEBiP/OsCERK1-mediated resistance to *U. virens***

343 To assess the role of OsCEBiP/OsCERK1 in rice resistance to *U. virens*, we  
344 inoculated the *U. virens* PJ52 and *uvchi1* mutant into wild-type rice and  
345 *oscebiip/oscerk1* double mutant (Supplemental Fig. S8). When compared to the high  
346 virulence of PJ52, the *uvchi1* mutant lost ability of developing false smut balls in both  
347 WT and *oscebiip/oscerk1* plants (Fig. 6A, E). We further checked the infection process  
348 of *uvchi1* mutant in rice panicles, and surprisingly found that some spikelets were  
349 indeed infected by *uvchi1*, of which the fungal mycelia embraced the inner floral organs  
350 including stamens and pistils (Fig. 6D). This infection status has been reported to be a  
351 prerequisite for symptom development of false smut disease (Fan et al., 2020). We  
352 quantified the numbers of infected panicle and infected spikelet per panicle, and  
353 observed that the reduced virulence caused by deletion of *UvChi1* was relieved in  
354 *oscebiip/oscerk1* mutant compared with WT (Fig. 6B, C, F, G). These data suggest that  
355 OsCEBiP/OsCERK1 contributes to rice resistance to the deletion mutant *uvchi1*;  
356 nevertheless, UvChi1 can disarm this immune pathway.

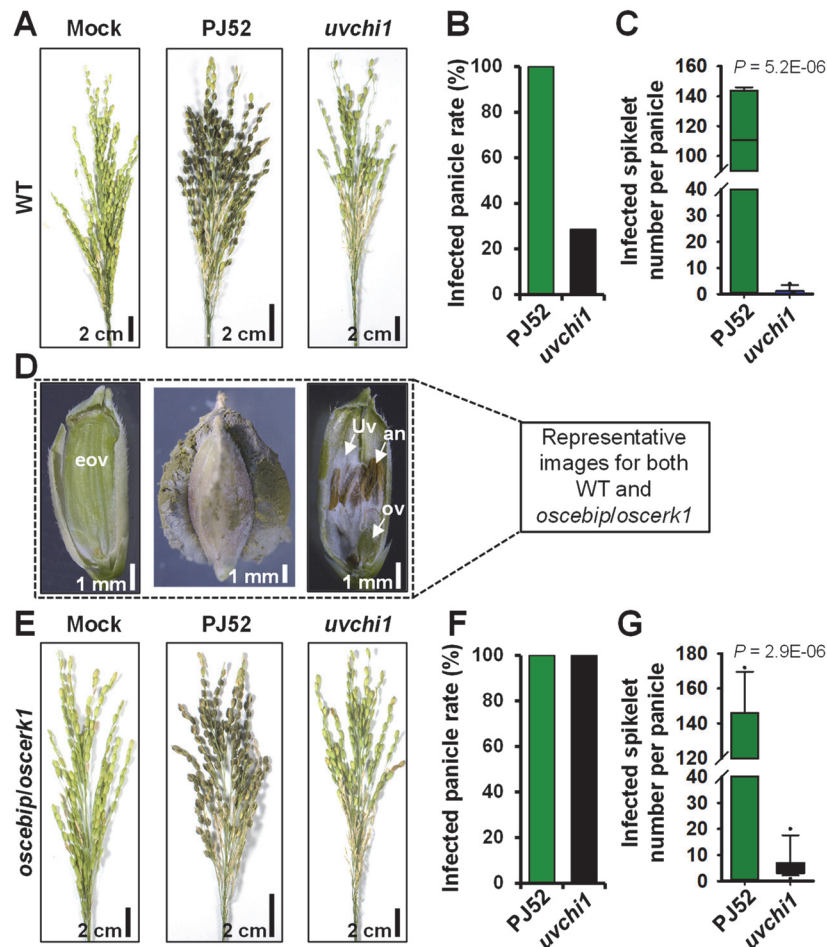

357

358 **Figure 6.** The role of OsCEBiP/OsCERK1 in resistance to *Ustilaginoidea virens*. Disease assay of  
 359 wide-type (WT) Q455 (A-C) and *oscebip/oscerk1* double mutant (E-G) infected with *U. virens* PJ52  
 360 and *uvchi1* knockout mutant. Note that *uvchi1* mutant failed to form false smut balls in either WT  
 361 or *oscebip/oscerk1*, but could infect rice spikelets to some extent, i.e. *U. virens* mycelia embracing  
 362 the inner floral organs (D). The infected panicle rate (B, F) and infected spikelet number per  
 363 diseased panicle (C, G) were quantified. Data of infected spikelet number are box-plotted ( $n > 15$ ).  
 364 *P* values were determined by Student's *t* test. an, anther. Uv, *U. virens*. ov, ovary. eov, expanded  
 365 ovary.

366

## 367 DISCUSSION

368 Chitin-triggered immunity is a conserved anti-fungal immune system in plants.  
 369 CEBiP/CERK1-mediated chitin signaling is a central plant immunity against leaf-  
 370 infecting fungal pathogens (Liu and Wang, 2016; Gong et al., 2020), whilst this chitin

371 signaling pathway was yet to be verified in plant flower organ. In the present work, we  
372 first showed that *OsCEBiP* and *OsCERK1* were highly expressed in rice spikelets  
373 (Supplemental Fig. S6); second, chitin treatment of rice spikelets could induce the  
374 expression of PTI marker genes, such as *OsNAC4*, *OsPR10b*, and *OsBETV1*, which was  
375 similarly observed in rice leaves (Fig. 2; Supplemental Fig. S4); third, chitin-induced  
376 expression of PTI marker genes was markedly attenuated in the spikelets expressing or  
377 treated with UvChi1 (Fig. 2; Supplemental Fig. S4); fourth, *oscebiP/oscerk1* mutant  
378 had enhanced susceptibility to the *U. virens uvchi1* (Fig. 6). These data support a  
379 functional OsCEBiP/OsCERK1-mediated immunity in rice flower organ.

380 Chitin-triggered immunity can be subverted by sophisticated fungal pathogens via  
381 multiple strategies as summarized in a recent review (Gong et al., 2020). For instance,  
382 fungal pathogens protect their cell wall from releasing plant immunity-inducible chitin  
383 fragments by secreting proteases to degrade plant chitinases (Okmen et al., 2018),  
384 masking cell wall with  $\alpha$ -1,3-glucan and effector proteins such as Avr4 and Avr4-like  
385 (van den Burg et al., 2006; Marshall et al., 2011; Fujikawa et al., 2012), or deacetylating  
386 chitin to chitosan (Gao et al., 2019). Fungal pathogens can also secrete effectors with  
387 high affinity to chitin to outcompete host chitin receptors, and/or with ability of  
388 degrading chitin oligomers, such as Ecp6 (de Jonge et al., 2010), Slp1 (Mentlak et al.,  
389 2012), MoAa91 (Li et al., 2020), MoChia1 (Han et al., 2019; Yang et al., 2019), and  
390 EWCAAs (Martínez-Cruz et al., 2021). Some fungi can utilize effectors like NIS1 and  
391 AvrPiz-t to target plant intracellular immune components involved in chitin signaling,  
392 such as BIK1 and OsRac1 (Bai et al., 2019; Irieda et al., 2019). In this study, we found  
393 that a secreted chitinase UvChi1 from *U. virens* directly targeted to the chitin receptor  
394 OsCEBiP and the co-receptor OsCERK1 to interfere with their mediated chitin  
395 signaling, in addition to the MoChia1-like roles of outcompeting rice receptors for  
396 chitin binding and degrading chitin (Supplemental Figs. S1, S4, S11) (Han et al., 2019).  
397 Our findings add new knowledge to the fungal counterstrategies for dampening chitin-  
398 triggered plant immunity, especially in floral organ.

399 Fungal chitinases have versatile roles in fungal nutrition, autolysis, growth, and

400 development (Hartl et al., 2012). Recent studies uncover novel functions of fungal  
401 chitinases in manipulating plant immunity. *Moniliophthora perniciosa*, *M. roreri* *M.*  
402 *oryzae*, and *Podosphaera xanthii* secrete enzymatically inactive or active chitinases as  
403 virulence factors to sequester chitin-triggered host immunity (Fiorin et al., 2018; Han  
404 et al., 2019; Yang et al., 2019; Martínez-Cruz et al., 2021). Accordingly, plant hosts  
405 have evolved cell-surface receptors to fight against these chitinase effectors. For  
406 example, rice utilizes the plasma membrane-localized OsTPR1 to recognize chitinase  
407 effector MoChia1 from a leaf-infecting pathogen *M. oryzae*, thereby releasing free  
408 chitin to re-trigger chitin-induced plant immunity (Yang et al., 2019). In our work,  
409 UvChi1 could not interact with OsTPR1 (Supplemental Fig. S5), thus possibly escaping  
410 from the surveillance of OsTPR1-activated immunity. Whether OsTPR1 can recognize  
411 other chitinase family members in *U. virens* needs to be clarified in future. Another  
412 plasma membrane-localized protein OsMBL1 can compete with the chitinase effector  
413 MoChia1 on chitin binding and cause earlier induction of defense response in rice cells,  
414 likely serving as a novel chitin sensor (Han et al., 2019). As OsMBL1 could not interact  
415 with UvChi1 (Supplemental Fig. S5) and *OsMBL1* gene was highly expressed in rice  
416 flowers (Supplemental Fig. S6), chitin-OsMBL1 signaling may function in rice flower  
417 immunity against *U. virens*. It could not be ruled out that the minor chitin receptors  
418 LYP4 and LYP6 (Liu et al., 2012) may be also involved in rice resistance to *U. virens*.  
419 Moreover, rice genome possesses a large pool of cell surface receptor-encoding genes,  
420 such as >1000 *RLKs* and 90 *RLPs* (Shiu et al., 2004; Fritz-Laylin et al., 2005). It would  
421 be interesting to identify candidate receptors that recognize *U. virens*-derived  
422 PAMPs/elicitors, and to characterize their roles in rice resistance to *U. virens*  
423 (Supplemental Fig. S11).

424 Notably, we observed that the deletion mutant *uvchi1* was unable to develop false  
425 smut balls in *oscebip/oscerk1* double mutant as well as in WT, although the infection  
426 rate increased to some extent in *oscebip/oscerk1* compared to that in WT (Fig. 6). This  
427 suggests that UvChi1 may function more than modulating chitin perception and  
428 signaling in rice. UvChi1 can possibly target other plant immune components to

429 promote *U. virens* infection, or manipulate rice metabolisms to gain abundant nutrients  
430 for the formation of false smut balls. Identifying other host targets of UvChi1 will help  
431 to unveil novel virulence mechanisms of *U. virens*.

432 Sequence analysis revealed that OsCEBiP and OsCERK1 were highly conserved  
433 among over 5000 rice accessions, suggesting a conserved and central role of chitin-  
434 OsCEBiP/OsCERK1 signaling in anti-fungal immunity of rice. Nevertheless, this  
435 immune pathway was dampened by *U. virens* via UvChi1 (Fig. 6), of which the protein  
436 sequence had no variations among all the examined *U. virens* isolates (Fig. 5C). In  
437 conclusion, *U. virens* can deploy a core effector to subvert a conserved anti-fungal  
438 immunity in rice, which could well-explain why *U. virens* is generally compatible with  
439 rice. Importantly, as UvChi1 is essential for *U. virens* pathogenicity to develop false  
440 smut balls (Fig. 1F and Fig. 6), it may serve as a promising target for the development  
441 of novel effective fungicides against *U. virens*.

442

## 443 **MATERIALS AND METHODS**

### 444 **Fungal and plant materials, growth conditions, and disease assay**

445 A virulent *U. virens* strain PJ52-2-5 (PJ52 for short) (Wang et al., 2016) was used in  
446 this work. It was isolated from a false smut ball naturally formed in rice accession  
447 Pujiang 6 in Sichuan, China. PJ52 was stored as mycelial clumps at  $-80^{\circ}\text{C}$ , and was  
448 reactivated on potato sucrose agar (PSA) at  $28^{\circ}\text{C}$  before use. Rice accession  
449 Nipponbare (NPB) and a germplasm Q455 were used in this study. For RT-qPCR and  
450 reactive oxygen species assays, rice plants were grown in climatic chambers at  $28^{\circ}\text{C}$ ,  
451 14 h light /  $25^{\circ}\text{C}$ , 10 h darkness. For rice false smut disease assay, rice plants were grown  
452 in an experimental field under natural conditions, and were maintained without  
453 spraying any fungicides at all growth stages of rice.

454 Infection of rice with *U. virens* was performed as described previously with minor  
455 modifications (Fan et al., 2015). Briefly, the potato sucrose broth (PSB)-cultured  
456 mixture of mycelia and conidia of *U. virens* strains were collected as inoculum, which  
457 was artificially injected with a syringe into rice panicles at late booting stages. Disease

458 symptoms were photographed and disease severity was recorded at around four week  
459 post inoculation (wpi).

#### 460 **Constructs and transformation**

461 For validation of *UvChi1* signal peptide (SP), predicted *UvChi1*<sup>SP</sup> sequence was  
462 synthesized by Sangon Biotech (Chengdu, China) and cloned into the  
463 pSUC2T7M13ORI (pSUC2) vector (Jacobs et al., 1997) to generate pSUC2-*UvChi1*<sup>SP</sup>.

464 To generate gene knockout and complementation plasmids for *UvChi1*, 955-bp  
465 upstream and 1034-bp downstream sequences were amplified and subcloned into a gene  
466 replacement vector pRF-HU2 (Frandsen et al., 2012) to generate pRF-HU2-*UvChi1*.  
467 To improve homologous recombination efficiency in *U. virens* gene knockout  
468 experiments, pCas9-tRp-gRNA-*UvChi1* plasmid was constructed by introducing a  
469 *UvChi1*-specific gRNA spacer into the pCas9-tRp-gRNA vector following previous  
470 reports (Liang et al., 2018; Guo et al., 2019). The hygromycin-resistant gene *Hph* in  
471 pSK1044 vector (Yu et al., 2015) was replaced by a basta-resistant gene *bar* amplified  
472 from the vector Pzp-Bar-Ex (Fan et al., 2019), resulting in vector SK1044-Bar. The  
473 entire *UvChi1* gene including 2.0-kb native promoter sequence and 0.5-kb downstream  
474 sequence was amplified and ligated into the *EcoRI-XhoI* linearized SK1044-Bar vector.  
475 The primers and gRNA spacer sequences are listed in Supplemental Table S2.

476 For purification of recombinant proteins, coding sequences of *UvChi1*, *UvChi1*<sup>mcb</sup>,  
477 *OsCEBiP*, *OsCERK1*, *OsMBL1*, *OsTPR1*, and *MoChia1* were amplified with indicated  
478 primers (Supplemental Table S2) and ligated into the *BamHI-EcoRI* linearized pMAL-  
479 c5x or pGEX-6p-1 vectors. *UvChi1*<sup>mcb</sup> was obtained through mutating the chitin  
480 binding sites in *UvChi1*.

481 To generate constructs for Co-IP experiments, the coding sequences of *UvChi1* or  
482 *UvChi1*<sup>mcb</sup> were amplified and cloned into the pCAMBIA1300 vector to generate  
483 plasmids 35S-*UvChi1* and 35S-*UvChi1*<sup>mcb</sup>. The coding sequences of *OsCEBiP* or  
484 *OsCERK1* were amplified and cloned into the pCAMBIA1300-3×FLAG or  
485 pCAMBIA1300-3×HA vectors to generate plasmids *OsCEBiP*-3×FLAG, *OsCERK1*-  
486 3×FLAG, *OsCEBiP*-3×HA, and *OsCERK1*-3×HA. *OsCEBiP*<sup>T2</sup>-3×FLAG,



487 OsCERK1<sup>T2</sup>-3×FLAG, OsCEBiP<sup>T2</sup>-3×HA, and OsCERK1<sup>T2</sup>-3×HA plasmids were  
488 obtained by mutating polymorphic sites to type 2 (T2) as indicated in Fig. 5. The primer  
489 sequences and related information are presented in Supplemental Table S2.

490 To make CRISPR-Cas9 constructs for simultaneously knocking-out *OsCEBiP* and  
491 *OsCERK1*, the gene-specific guide RNAs were designed with an online software toolkit  
492 CRISPR-GE (Xie et al., 2017) and subcloned into the pRGEB32 binary vector,  
493 resulting in Cas9-OsCEBiP/OsCERK1 construct. Guide RNA sequences and primers  
494 are listed in Supplemental Table S2.

495 To knockout *UvChi1* in *U. virens*, gene replacement construct pRF-HU2-UvChi1 and  
496 pCas9-tRP-gRNA-UvChi1 were co-transformed into protoplasts of *U. virens* strain  
497 PJ52 as described by a previous study (Talbot et al., 1993). Knockout mutants were  
498 screened from hygromycin-resistant transformants by PCR. The positions of primers  
499 are indicated in Fig. S2. For complementation assay, the construct SK1044-Bar-UvChi1  
500 (Basta resistance) was introduced into *Agrobacterium* strain AGL1, and transformed  
501 into conidia of PJ52 according to our previous work (Fan et al., 2019). Positive  
502 transformants were confirmed by PCR and subjected to phenotype analysis and disease  
503 assay.

504 To generate transgenic rice plants, *Agrobacterium* strain EHA105 containing 35S-  
505 UvChi1 or Cas9-OsCEBiP/OsCERK1 was introduced into rice accession Q455 or NPB  
506 via *Agrobacterium*-mediated transformation. Positive transgenic lines were confirmed  
507 by hygromycin test and PCR.

#### 508 **Validating secretion of UvChi1**

509 To verify the functionality of UvChi1 signal peptide, plasmids of pSUC2-UvChi1<sup>SP</sup>,  
510 pSUC2-Avr1b<sup>SP</sup>, and pSUC2-Mg87<sup>N</sup> were transformed into yeast strain YTK12 and  
511 subjected to yeast secretion assay as performed previously (Fan et al., 2019).

512 To further confirm whether UvChi1 could be secreted, a monoclonal antibody against  
513 UvChi1 in rabbits using the synthetic peptide GRADPSPQGEDLTTSC was raised at  
514 Hangzhou Hua'an Biotechnology Co., Ltd, China. *U. virens* PJ52 was cultured in PSB  
515 for seven days, and then mycelia and culture supernatant were separated for protein

516 extraction following a previous report (Zhang et al., 2020). The proteins were separated  
517 in 10% SDS-PAGE gels and subjected to Western blot using anti-UvChi1 and anti-  
518 GAPDH antibodies.

### 519 **Chitin binding and chitinase activity assays**

520 The recombinant proteins (GST-UvChi1, MBP-UvChi1, MBP-UvChi1<sup>mcb</sup>, MBP-  
521 OsCEBiP, GST, and MBP) were purified from *Escherichia coli* and used for chitin  
522 binding assay as described with modifications (Han et al., 2019). Briefly, the  
523 recombinant proteins (a final concentration of 0.06 mg ml<sup>-1</sup>) were incubated with chitin  
524 beads (a final concentration of 20 µl ml<sup>-1</sup>), shrimp shell chitin (20 mg ml<sup>-1</sup>), cellulose  
525 (20 mg ml<sup>-1</sup>), or chitosan (20 mg ml<sup>-1</sup>) in 800 µl ddH<sub>2</sub>O at 4°C. After 4 h, the insoluble  
526 pellet fraction was centrifuged (4°C, 12000 rpm, 10 min), and the supernatant was  
527 collected. The insoluble pellets were rinsed three times with ddH<sub>2</sub>O. Both the  
528 supernatants and the pellets were boiled in 1% SDS for extraction of proteins, which  
529 were then separated in 10% SDS-PAGE gels and immunoblotted with anti-GST  
530 (Invitrogen) or anti-MBP antibodies (NEB).

531 Chitinase activity assay was conducted following a previous method with minor  
532 modifications (Thompson et al., 2001). Briefly, 20 µl of fluorescent substrate 4-  
533 methylumbelliferyl-β-D-N , N ' , N " -triacetylchitotriose (1 mM in DMSO) was mixed  
534 with 150 µl of 200 mM sodium phosphate buffer (pH 6.7), and incubated for 20 min at  
535 37°C. The reaction started by the addition of 30 µl of GST-UvChi1 or GST (2.0 mg ml<sup>-1</sup>  
536 each). After 2 h at 37 °C, the reaction was stopped by the addition of 50 µl of 3 M  
537 NaCO<sub>3</sub>. The fluorescence of released by 4-methylumbelliferone was determined at an  
538 excitation wavelength of 390 nm and emission wavelength of 442 nm using spectral  
539 scanning multifunctional reader (Thermo Scientific Variskan Flash 4.00.53).

### 540 **Nucleic acid extraction, RT-qPCR, and PCR**

541 *U. virens* mycelia were collected from PSA for extraction of genomic DNA and total  
542 RNA using CTAB method (Doyle and Doyle, 1990) and TRIzol reagent (Invitrogen),  
543 respectively. For quantification of *UvChi1* transcriptional level, *U. virens* RNA was  
544 reverse-transcribed using ReverTra Ace PCR RT Kit (TOYOBO); the resultant cDNA

545 was used for qPCR with SYBR Green mix (Qiagen) and gene-specific primers.  
546 *UvTub2a* was served as a reference gene. For polymorphism analysis of *UvChi1*,  
547 genomic DNA of tested *U. virens* isolates were used to amplify the full-length of  
548 *UvChi1* gene. The PCR products were directly sequenced at Sangon Biotech (Chengdu)  
549 Co., Ltd, China. Primers used in this study are listed in Supplemental Table S2.

550 For experiments of chitin co-incubation with the recombinant proteins, fully-  
551 expanded rice leaves at 4-leaf stage and developing spikelets at late booting stage were  
552 used. Leaf discs or individual spikelets were floated on ddH<sub>2</sub>O overnight at room  
553 temperature, and then treated with chitin (30 µg ml<sup>-1</sup>) after 1 h-incubation with the  
554 recombinant proteins (GST-UvChi1, GST, MBP-UvChi1, MBP-UvChi1<sup>mcb</sup>, and MBP;  
555 30 µg ml<sup>-1</sup> for each). Rice samples were then collected for total RNA extraction and RT-  
556 qPCR analysis. Note that the recombinant proteins were dialyzed with ddH<sub>2</sub>O before  
557 use.

558 For experiments of leaf co-incubation with the recombinant proteins, leaf discs were  
559 floated on ddH<sub>2</sub>O overnight at room temperature, and then co-incubated with the  
560 recombinant proteins (MBP-UvChi1, MBP-UvChi1<sup>mcb</sup>, or MBP; 30 µg ml<sup>-1</sup> for each)  
561 for 6 h before chitin treatment. This co-incubation treatment may give enough time for  
562 the recombinant proteins to approach the cell surface receptors OsCEBiP and  
563 OsCERK1. RT-qPCR analysis was performed using *OsUbi* used as a reference gene.  
564 Primers used in this study are listed in Supplemental Table S2.

### 565 **Measurement of reactive oxygen species**

566 To determine the burst of ROS in rice or *N. benthamiana* leaves, leaf discs were  
567 floated on ddH<sub>2</sub>O overnight. For experiments of chitin co-incubation with the  
568 recombinant proteins, chitin (8 µM, hexa-N-acetylchitohexaose) was incubated with  
569 the recombinant proteins (GST-UvChi1, GST, MBP-UvChi1, MBP-UvChi1<sup>mcb</sup>, and  
570 MBP; 30 µg ml<sup>-1</sup> for each) for 1h, and then mixed with 20 µM luminol and 10 µg ml<sup>-1</sup>  
571 horseradish peroxidase. The resultants were applied to leaf discs to induce ROS, which  
572 was measured in a GloMax 20/20 luminometer (Shi et al., 2018). For experiments of  
573 leaf co-incubation with the recombinant proteins, overnight leaf discs were incubated

574 with the recombinant proteins (MBP-UvChi1, MBP-UvChi1<sup>mcb</sup>, or MBP) for 6 h, and  
575 then treated with ROS-inducing mixture (8  $\mu$ M chitin, 20  $\mu$ M luminol, and 10  $\mu$ g ml<sup>-1</sup>  
576 horseradish peroxidase).

#### 577 **GST pull-down assay**

578 The recombinant proteins (GST-OsCEBiP, GST-OsCERK1, MBP-UvChi1, MBP-  
579 UvChi1<sup>mcb</sup>, GST-UvChi1, GST-MoChia1, MBP-OsMBL1, MBP-OsTPR1, GST, and  
580 MBP) were purified from *E. coli* and used for GST pull-down assays as described  
581 previously (Wang et al., 2017). Detection of GST- and MBP-fused proteins was  
582 performed with anti-GST (Invitrogen) and anti-MBP antibodies (NEB), respectively.

#### 583 **Co-immunoprecipitation assay**

584 *Agrobacteria* GV3101 strains containing indicated constructs were adjusted to a  
585 concentration of OD<sub>600</sub> = 0.5, and infiltrated into the leaves of *N. benthamiana*. At 36-  
586 48 h post infiltration, total proteins of treated leaves were isolated for co-  
587 immunoprecipitation assay according to a previous study (Zhou et al., 2015). Anti-  
588 FLAG, anti-UvChi1, and anti-GFP antibodies were used for immunoblotting. For Co-  
589 IP competition assays, chitin (from shrimp shells, 20  $\mu$ g ml<sup>-1</sup>) was infiltrated into *N.*  
590 *benthamiana* leaves at 10 min before protein extraction.

#### 591 **Sequence analysis**

592 The genomic sequences of *OsCEBiP* and *OsCERK1* for each haplotype were  
593 retrieved from the database of MBKbase-rice (<http://mbkbase.org/rice>). The genomic  
594 sequence of *UvChi1* was amplified from different *U. virens* isolates (Supplemental  
595 Table S1) with gene-specific primers (Supplemental Table S2) and identified by  
596 sequencing. Corresponding protein sequences were deduced by using online software  
597 (<https://web.expasy.org/translate>). Sequence alignment was conducted with the  
598 MultAlin software (Corpet, 1988).

599

## 600 **Supplemental Data**

601 The following materials are available in the online version of this article.

602 **Supplemental Figure S1.** *UvChi1* encodes a fungal chitinase.

603 **Supplemental Figure S2.** Generation of *UvChi1* knockout mutants and pathogenicity  
604 test.

605 **Supplemental Figure S3.** Ectopic expression of *UvChi1* promotes *Ustilaginoidea*  
606 *virens* infection in rice.

607 **Supplemental Figure S4.** *UvChi1* binds to chitin and blocks chitin perception in rice.

608 **Supplemental Figure S5.** *UvChi1* does not interact with *OsMBL1* and *OsTPR1*.

609 **Supplemental Figure S6.** *OsCEBiP*, *OsCERK1*, *OsMBL1*, and *OsTPR1* are highly  
610 expressed in rice spikelets.

611 **Supplemental Figure S7.** Generation of *UvChi1* protein mutated at chitin-binding sites.

612 **Supplemental Figure S8.** Generation of *oscebip/oscerk1* double mutants.

613 **Supplemental Figure S9.** Protein sequence alignment of *OsCEBiP*<sup>58-356</sup>.

614 **Supplemental Figure S10.** *UvChi1* interferes with the oligomerizations of *OsCEBiP*<sup>T2</sup>  
615 and *OsCERK1*<sup>T2</sup>.

616 **Supplemental Figure S11.** A proposed model of *UvChi1* virulence mechanisms.

617 **Supplemental Table S1.** *Ustilaginoidea virens* isolates used for DNA polymorphism  
618 analysis.

619 **Supplemental Table S2.** Primers used in this study.

620

## 621 **ACKNOWLEDGEMENTS**

622 We thank Dr. Yongfeng Liu for pSK1044 plasmid, Zhengguang Zhang for pCas9-tRP-  
623 gRNA vector, and Pengfei Qi for pRF-HU2 vector. We thank Drs. Dongwei Hu, Chaoxi  
624 Luo, Peizhou Xu, and Chaoqun Zang for providing *U. virens* isolates used for  
625 polymorphism analysis.

626

## 627 **COMPETING INTERESTS**

628 The authors declare no competing interests.

629 **LITERATURE CITED**

- 630 **Ashizawa T, Takahashi M, Arai M, Arie T** (2012) Rice false smut pathogen, *Ustilagoideae virens*,  
631 invades through small gap at the apex of a rice spikelet before heading. *Journal of General Plant*  
632 *Pathology* **78**: 255-259
- 633 **Bai P, Park CH, Shirsekar G, Songkumarn P, Bellizzi M, Wang GL** (2019) Role of lysine residues  
634 of the *Magnaporthe oryzae* effector AvrPiz-t in effector- and PAMP-triggered immunity.  
635 *Molecular Plant Pathology* **20**: 599-608
- 636 **Brefort T, Doehlemann G, Mendoza-Mendoza A, Reissmann S, Djamei A, Kahmann R** (2009)  
637 *Ustilago maydis* as a pathogen. *Annual Review of Phytopathology* **47**: 423-445
- 638 **Corpet F** (1988) Multiple sequence alignment with hierarchical clustering. *Nucleic Acids Research* **16**:  
639 10881-10890
- 640 **de Jonge R, Peter van Esse H, Kombrink A, Shinya T, Desaki Y, Bours R, van der Krol S, Shibuya**  
641 **N, Joosten MHAJ, Thomma BPHJ** (2010) Conserved fungal LysM effector Ecp6 prevents  
642 chitin-triggered immunity in plants. *Science* **329**: 953-955
- 643 **Doyle JJ, Doyle JL** (1990) Isolation of plant DNA from fresh tissue. *Focus* **12**: 13-15
- 644 **Fan J, Bai P, Ning Y, Wang J, Shi X, Xiong Y, Zhang K, He F, Zhang C, Wang R, Meng X, Zhou J,**  
645 **Wang M, Shirsekar G, Park CH, Bellizzi M, Liu W, Jeon JS, Xia Y, Shan L, Wang GL**  
646 (2018) The monocot-specific receptor-like kinase SDS2 controls cell death and immunity in  
647 rice. *Cell Host Microbe* **23**: 498-510 e495
- 648 **Fan J, Du N, Li L, Li G, Wang Y, Zhou Y, Hu X, Liu J, Zhao J, Li Y, Huang F, Wang WM** (2019)  
649 A core effector UV\_1261 promotes *Ustilagoideae virens* infection via spatiotemporally  
650 suppressing plant defense. *Phytopathology Research* **1**: 11
- 651 **Fan J, Guo XY, Li L, Huang F, Sun WX, Li Y, Huang YY, Xu YJ, Shi J, Lei Y, Zheng AP, Wang**  
652 **WM** (2015) Infection of *Ustilagoideae virens* intercepts rice seed formation but activates grain-  
653 filling-related genes. *Journal of Integrative Plant Biology* **57**: 577-590
- 654 **Fan J, Liu J, Gong Z-Y, Xu P-Z, Hu X-H, Wu J-L, Li GB, Yang J, Wang Y-Q, Zhou Y-F, Li S-C,**  
655 **Wang L, Chen X-Q, He M, Zhao J-Q, Li Y, Huang Y-Y, Hu D-W, Wu X-J, Li P, Wang W-**  
656 **M** (2020) The false smut pathogen *Ustilagoideae virens* requires rice stamens for false smut  
657 ball formation. *Environmental Microbiology* **22**: 646-659
- 658 **Fan J, Yang J, Wang YQ, Li GB, Li Y, Huang F, Wang W-M** (2016) Current understanding on  
659 *Villosiclava virens*, a unique flower-infecting fungus causing rice false smut disease. *Molecular*  
660 *Plant Pathology* **17**: 1321-1330
- 661 **Fang A, Han Y, Zhang N, Zhang M, Liu L, Li S, Lu F, Sun WX** (2016) Identification and  
662 characterization of plant cell death-inducing secreted proteins from *Ustilagoideae virens*.  
663 *Molecular Plant-Microbe Interactions* **29**: 405-416
- 664 **Fang AF, Gao H, Zhang N, Zheng XH, Qiu SS, Li YJ, Zhou S, Cui FH, Sun WX** (2019) A novel  
665 effector gene *SCRE2* contributes to full virulence of *Ustilagoideae virens* to rice. *Frontiers in*  
666 *Microbiology* **10**: 845
- 667 **Fiorin GL, Sanchez-Vallet A, Thomazella DPD, do Prado PFV, do Nascimento LC, Figueira AVD,**  
668 **Thomma BPHJ, Pereira GAG, Teixeira PJPL** (2018) Suppression of plant immunity by  
669 fungal chitinase-like effectors. *Current Biology* **28**: 3023-3030
- 670 **Frandsen RJ, Frandsen M, Giese H** (2012) Targeted gene replacement in fungal pathogens via  
671 *Agrobacterium tumefaciens*-mediated transformation. *Methods in Molecular Biology* **835**: 17-

- 672 45
- 673 **Fritz-Laylin LK, Krishnamurthy N, Tor M, Sjolander KV, Jones JD** (2005) Phylogenomic analysis  
674 of the receptor-like proteins of rice and Arabidopsis. *Plant Physiology* **138**: 611-623
- 675 **Fujikawa T, Sakaguchi A, Nishizawa Y, Kouzai Y, Minami E, Yano S, Koga H, Meshi T, Nishimura**  
676 **M** (2012) Surface alpha-1,3-glucan facilitates fungal stealth infection by interfering with innate  
677 immunity in plants. *PLoS Pathogens* **8**: e1002882
- 678 **Gao F, Zhang BS, Zhao JH, Huang JF, Jia PS, Wang S, Zhang J, Zhou JM, Guo HS** (2019)  
679 Deacetylation of chitin oligomers increases virulence in soil-borne fungal pathogens. *Nature*  
680 *Plants* **5**: 1167-1176
- 681 **Gong B-Q, Wang F-Z, Li J-F** (2020) Hide-and-Seek: Chitin-triggered plant Immunity and fungal  
682 counterstrategies. *Trends in Plant Science* **25**: 805-816
- 683 **Gong B-Q, Wang F-Z, Li J-F** (2020) Hide-and-Seek: Chitin-Triggered Plant Immunity and Fungal  
684 Counterstrategies. *Trends in Plant Science*
- 685 **Guo W, Gao Y, Yu Z, Xiao Y, Zhang Z, Zhang H** (2019) The adenylate cyclase UvAc1 and  
686 phosphodiesterase UvPdeH control the intracellular cAMP level, development, and  
687 pathogenicity of the rice false smut fungus *Ustilaginoidea virens*. *Fungal Genetics and Biology*  
688 **129**: 65-73
- 689 **Han Y, Zhang K, Yang J, Zhang N, Fan A, Zhang Y, Liu Y, Chen Z, Hsiang T, Sun W** (2015)  
690 Differential expression profiling of the early response to *Ustilaginoidea virens* between false  
691 smut resistant and susceptible rice varieties. *BMC Genomics* **16**: 955
- 692 **Han YJ, Song LL, Peng CL, Liu X, Liu LH, Zhang YH, Wang WZ, Zhou J, Wang SH, Ebbola D,**  
693 **Wang ZH, Lu GD** (2019) A *Magnaporthe* chitinase interacts with a rice jacalin-related lectin  
694 to promote host colonization. *Plant Physiology* **179**: 1416-1430
- 695 **Hartl L, Zach S, Seidl-Seiboth V** (2012) Fungal chitinases: diversity, mechanistic properties and  
696 biotechnological potential. *Applied Microbiology and Biotechnology* **93**: 533-543
- 697 **Hayafune M, Berisio R, Marchetti R, Silipo A, Kayama M, Desaki Y, Arima S, Squeglia F, Ruggiero**  
698 **A, Tokuyasu K, Molinaro A, Kaku H, Shibuya N** (2014) Chitin-induced activation of immune  
699 signaling by the rice receptor CEBiP relies on a unique sandwich-type dimerization.  
700 *Proceedings of the National Academy of Sciences of the United States of America* **111**: E404-  
701 413
- 702 **Ikegami H** (1963) Studies on the false smut of rice X. Invasion of chlamydospores and hyphae of the  
703 false smut fungus into rice plants. *Research Bulletin of the Faculty of Agriculture, Gifu*  
704 *University* **18**: 54-60
- 705 **Irieda H, Inoue Y, Mori M, Yamada K, Oshikawa Y, Saitoh H, Uemura A, Terauchi R, Kitakura S,**  
706 **Kosaka A, Singkaravanit-Ogawa S, Takano Y** (2019) Conserved fungal effector suppresses  
707 PAMP-triggered immunity by targeting plant immune kinases. *Proceedings of the National*  
708 *Academy of Sciences of the United States of America* **116**: 496-505
- 709 **Jacobs KA, Collinsracie LA, Colbert M, Duckett M, Goldenfleet M, Kelleher K, Kriz R, LaVallie**  
710 **ER, Merberg D, Spaulding V, Stover J, Williamson MJ, McCoy JM** (1997) A genetic  
711 selection for isolating cdnas encoding secreted proteins. *Gene* **198**: 289-296
- 712 **Jones JD, Dangl JL** (2006) The plant immune system. *Nature* **444**: 323-329
- 713 **Kaku H, Nishizawa Y, Ishii-Minami N, Akimoto-Tomiyama C, Dohmae N, Takio K, Minami E,**  
714 **Shibuya N** (2006) Plant cells recognize chitin fragments for defense signaling through a plasma  
715 membrane receptor. *Proceedings of the National Academy of Sciences of the United States of*

- 716 America **103**: 11086-11091
- 717 **Li Y, Liu X, Liu M, Wang Y, Zou Y, You Y, Yang L, Hu J, Zhang H, Zheng X, Wang P, Zhang Z**
- 718 (2020) *Magnaporthe oryzae* auxiliary activity protein MoAa91 functions as chitin-binding
- 719 protein to induce appressorium formation on artificial inductive surfaces and suppress plant
- 720 immunity. *mBio* **11**: e03304-03319
- 721 **Liang YF, Han Y, Wang CF, Jiang C, Xu JR** (2018) Targeted deletion of the *USTA* and *UvSLT2* genes
- 722 efficiently in *Ustilaginoidea virens* with the CRISPR-Cas9 System. *Frontiers in Plant Science*
- 723 **9**: 699
- 724 **Liu B, Li JF, Ao Y, Qu J, Li Z, Su J, Zhang Y, Liu J, Feng D, Qi K, He Y, Wang J, Wang HB** (2012)
- 725 Lysin motif-containing proteins LYP4 and LYP6 play dual roles in peptidoglycan and chitin
- 726 perception in rice innate immunity. *Plant Cell* **24**: 3406-3419
- 727 **Liu W, Wang G-L** (2016) Plant innate immunity in rice: a defense against pathogen infection. *National*
- 728 *Science Review* **3**: 295-308
- 729 **Marshall R, Kombrink A, Motteram J, Loza-Reyes E, Lucas J, Hammond-Kosack KE, Thomma**
- 730 **BP, Rudd JJ** (2011) Analysis of two in planta expressed LysM effector homologs from the
- 731 fungus *Mycosphaerella graminicola* reveals novel functional properties and varying
- 732 contributions to virulence on wheat. *Plant Physiology* **156**: 756-769
- 733 **Martínez-Cruz J, Romero D, Hierrezuelo J, Thon M, de Vicente A, Pérez-García A** (2021) Effectors
- 734 With Chitinase Activity (EWCAs), a family of conserved, secreted fungal chitinases that
- 735 suppress chitin-triggered immunity. *The Plant Cell* doi:10.1093/plcell/koab011
- 736 **Mentlak TA, Kombrink A, Shinya T, Ryder LS, Otomo I, Saitoh H, Terauchi R, Nishizawa Y,**
- 737 **Shibuya N, Thomma BPHJ, Talbot NJ** (2012) Effector-mediated suppression of chitin-
- 738 triggered immunity by *Magnaporthe oryzae* is necessary for rice blast disease. *The Plant Cell*
- 739 **24**: 322-335
- 740 **Okmen B, Kemmerich B, Hilbig D, Wemhoner R, Aschenbroich J, Perrar A, Huesgen PF, Schipper**
- 741 **K, Doehlemann G** (2018) Dual function of a secreted fungalysin metalloprotease in *Ustilago*
- 742 *maydis*. *New Phytologist* **220**: 249-261
- 743 **Peng H, Wang K, Chen Z, Cao Y, Gao Q, Li Y, Li X, Lu H, Du H, Lu M, Yang X, Liang C** (2020)
- 744 MBKbase for rice: an integrated omics knowledgebase for molecular breeding in rice. *Nucleic*
- 745 *Acids Research* **48**: D1085-D1092
- 746 **Prakobsub K, Ashizawa T** (2017) Intercellular invasion of rice roots at the seedling stage by the rice
- 747 false smut pathogen, *Villosiclava virens*. *Journal of General Plant Pathology*: 1-4
- 748 **Schroud P, TeBeest DO** (2005) Germination and infection of rice roots by spores of *Ustilaginoidea*
- 749 *virens*. *AAES Research Series* **540**: 143-151
- 750 **Shi XT, Long Y, He F, Zhang CY, Wang RY, Zhang T, Wu W, Hao ZY, Wang Y, Wang GL, Ning**
- 751 **YS** (2018) The fungal pathogen *Magnaporthe oryzae* suppresses innate immunity by
- 752 modulating a host potassium channel. *PLoS Pathogens* **14**: e1006878
- 753 **Shimizu T, Nakano T, Takamizawa D, Desaki Y, Ishii-Minami N, Nishizawa Y, Minami E, Okada**
- 754 **K, Yamane H, Kaku H, Shibuya N** (2010) Two LysM receptor molecules, CEBiP and
- 755 OsCERK1, cooperatively regulate chitin elicitor signaling in rice. *Plant Journal* **64**: 204-214
- 756 **Shiu SH, Karlowski WM, Pan R, Tzeng YH, Mayer KF, Li WH** (2004) Comparative analysis of the
- 757 receptor-like kinase family in Arabidopsis and rice. *Plant Cell* **16**: 1220-1234
- 758 **Song JH, Wei W, Lv B, Lin Y, Yin WX, Peng YL, Schnabel G, Huang JB, Jiang DH, Luo CX** (2016)
- 759 Rice false smut fungus hijacks the rice nutrients supply by blocking and mimicking the



- 760 fertilization of rice ovary. *Environmental Microbiology* **18**: 3840-3849
- 761 **Sun W, Fan J, Fang A, Li Y, Tariqjaveed M, Li D, Hu D, Wang W-M** (2020) *Ustilaginoidea virens*:  
762 Insights into an emerging rice pathogen. *Annual Review of Phytopathology* **58**: 363-385
- 763 **Talbot NJ, Ebbole DJ, Hamer JE** (1993) Identification and characterization of *MPG1*, a gene involved  
764 in pathogenicity from the rice blast fungus *Magnaporthe grisea*. *Plant Cell* **5**: 1575-1590
- 765 **Tang YX, Jin J, Hu DW, Yong ML, Xu Y, He LP** (2013) Elucidation of the infection process of  
766 *Ustilaginoidea virens* (teleomorph: *Villosiclava virens*) in rice spikelets. *Plant Pathology* **62**: 1-  
767 8
- 768 **Thompson SE, Smith M, Wilkinson MC, Peek K** (2001) Identification and characterization of a  
769 chitinase antigen from *Pseudomonas aeruginosa* strain 385. *Applied and Environmental*  
770 *Microbiology* **67**: 4001-4008
- 771 **Tudzynski P, Scheffer J** (2004) *Claviceps purpurea*: molecular aspects of a unique pathogenic lifestyle.  
772 *Molecular Plant Pathology* **5**: 377-388
- 773 **van den Burg HA, Harrison SJ, Joosten MH, Vervoort J, de Wit PJ** (2006) *Cladosporium fulvum*  
774 Avr4 protects fungal cell walls against hydrolysis by plant chitinases accumulating during  
775 infection. *Molecular Plant-Microbe Interactions* **19**: 1420-1430
- 776 **Wang C, Wang G, Zhang C, Zhu P, Dai H, Yu N, He Z, Xu L, Wang E** (2017) OsCERK1-mediated  
777 chitin perception and immune signaling requires receptor-like cytoplasmic kinase 185 to  
778 activate an MAPK cascade in rice. *Molecular Plant* **10**: 619-633
- 779 **Wang J, Liu X, Zhang A, Ren Y, Wu F, Wang G, Xu Y, Lei C, Zhu S, Pan T, Wang Y, Zhang H,**  
780 **Wang F, Tan YQ, Wang Y, Jin X, Luo S, Zhou C, Zhang X, Liu J, Wang S, Meng L, Wang**  
781 **Y, Chen X, Lin Q, Zhang X, Guo X, Cheng Z, Wang J, Tian Y, Liu S, Jiang L, Wu C, Wang**  
782 **E, Zhou JM, Wang YF, Wang H, Wan J** (2019) A cyclic nucleotide-gated channel mediates  
783 cytoplasmic calcium elevation and disease resistance in rice. *Cell Research* **29**: 820-831
- 784 **Wang J, Yu H, Xiong GS, Lu ZF, Jiao YQ, Meng XB, Liu GF, Chen XW, Wang YH, Li JY** (2017)  
785 Tissue-specific ubiquitination by IPA1 INTERACTING PROTEIN1 modulates IPA1 protein  
786 levels to regulate plant architecture in rice. *Plant Cell* **29**: 697-707
- 787 **Wang YQ, Li GB, Gong ZY, Li Y, Huang F, Fan J, Wang WM** (2016) Stachyose is a preferential  
788 carbon source utilized by the rice false smut pathogen, *Villosiclava virens*. *Physiological and*  
789 *Molecular Plant Pathology* **96**: 69-76
- 790 **Xie XR, Ma XL, Zhu QL, Zeng DC, Li GS, Liu YG** (2017) CRISPR-GE: A convenient software toolkit  
791 for CRISPR-based genome editing. *Molecular Plant* **10**: 1246-1249
- 792 **Xu X, Nicholson P** (2009) Community ecology of fungal pathogens causing wheat head blight. *Annual*  
793 *Review of Phytopathology* **47**: 83-103
- 794 **Yang C, Yu YQ, Huang JK, Meng FW, Pang JH, Zhao QQ, Islam MA, Xu N, Tian Y, Liu J** (2019)  
795 Binding of the *Magnaporthe oryzae* chitinase MoChia1 by a rice tetratricopeptide repeat protein  
796 allows free chitin to trigger immune responses. *Plant Cell* **31**: 172-188
- 797 **Yong ML, Liu YJ, Chen TQ, Fan LL, Wang ZY, Hu DW** (2018) Cytological studies on the infection  
798 of rice root by *Ustilaginoidea virens*. *Microscopy Research and Technique* **81**: 389-396
- 799 **Yu M, Yu J, Hu J, Huang L, Wang Y, Yin X, Nie Y, Meng X, Wang W, Liu Y** (2015) Identification of  
800 pathogenicity-related genes in the rice pathogen *Ustilaginoidea virens* through random  
801 insertional mutagenesis. *Fungal Genetics and Biology* **76**: 10-19
- 802 **Zhang N, Yang J, Fang AF, Wang J, Li D, Li Y, Wang S, Cui F, Yu J, Liu Y, Peng Y-L, Sun W** (2020)  
803 The essential effector SCRE1 in *Ustilaginoidea virens* suppresses rice immunity via a small

804 peptide region. *Molecular Plant Pathology* **21**: 445-459

805 **Zhang Y, Zhang K, Fang A, Han Y, Yang J, Xue M, Bao J, Hu D, Zhou B, Sun X, Li S, Wen M, Yao**

806 **N, Ma LJ, Liu Y, Zhang M, Huang F, Luo C, Zhou L, Li J, Chen Z, Miao J, Wang S, Lai**

807 **J, Xu JR, Hsiang T, Peng YL, Sun W** (2014) Specific adaptation of *Ustilaginoidea virens* in

808 occupying host florets revealed by comparative and functional genomics. *Nature*

809 *Communications* **5**: 3849

810 **Zhou L, Lu S, Shan T, Wang P, Sun W, Chen Z, Wang S** (2012) Chemistry and biology of mycotoxins

811 from rice false smut pathogen. *In* BJ Melborn, JC Greene, eds, *Mycotoxins: Properties,*

812 *Applications and Hazards*. Nova Science Publishers, New York, NY, USA, pp 109-130

813 **Zhou ZY, Wu YJ, Yang YQ, Du MM, Zhang XJ, Guo Y, Li CY, Zhou JM** (2015) An Arabidopsis

814 plasma membrane proton ATPase modulates JA signaling and is exploited by the *Pseudomonas*

815 *syringae* effector protein AvrB for stomatal invasion. *Plant Cell* **27**: 2032-2041
